# Supplementary material
Source: PubMed Central journal article supplement (PMC7033972)
Supplement: ao9b03411_si_001.pdf [file ao9b03411_si_001.pdf]

## ***Supporting Information***

# **Insight into the adsorption and photocatalytic behaviors of Organo-bentonite/Co<sub>3</sub>O<sub>4</sub> green nanocomposite for Malachite green synthetic dye and Cr (VI) metal ions; application and mechanisms**

**Mohamed Abdel Salam<sup>†</sup>, Mostafa R. Abukhadra <sup>\*‡</sup>, Alyaa Adlii <sup>‡§</sup>**

<sup>†</sup>Chemistry Department, Faculty of Science, King Abdulaziz University, Jeddah, P.O Box 80200-Jeddah 21589, Kingdom of Saudi Arabia

<sup>‡</sup>Materials Technologies and their Applications Lab, Geology Department, Faculty of Science, Beni-Suef University, Beni Suef City, Egypt

<sup>§</sup>Geology Department, Faculty of Science, Beni-Suef University, Egypt

<sup>§</sup> Department of Chemistry, Faculty of Education, Beni-Suef University, 62514 Beni-Suef City, Egypt

## **Content**

1. EDX analysis of organo-bentonite supported by Co<sub>3</sub>O<sub>4</sub>.....S2
2. FT-IR spectra of bentonite, cetyltrimethylammonium bromide, organically modified bentonite, and organo-bentonite supported by Co<sub>3</sub>O<sub>4</sub>.....S3
3. Linear fitting of the adsorption results with Elovich Kinetic model.....S4
4. Effect of the integration process on the adsorption and photocatalytic performance of organo-bentonite supported by Co<sub>3</sub>O<sub>4</sub>.....S5

## 1. EDX analysis

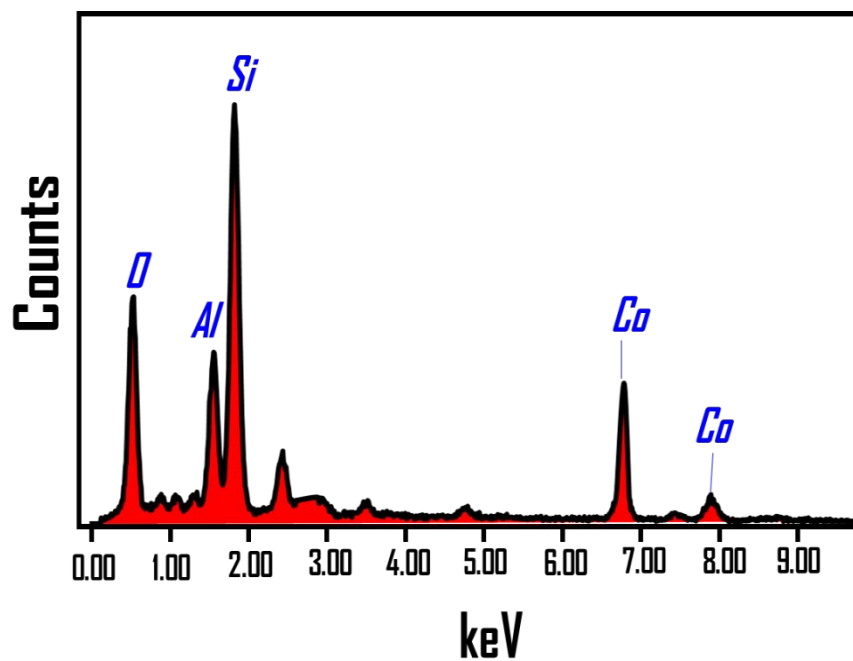

**Figure S1.** EDX analysis of organo-bentonite supported by  $\text{Co}_3\text{O}_4$  (OB/Co)

## 2. FT-IR spectra

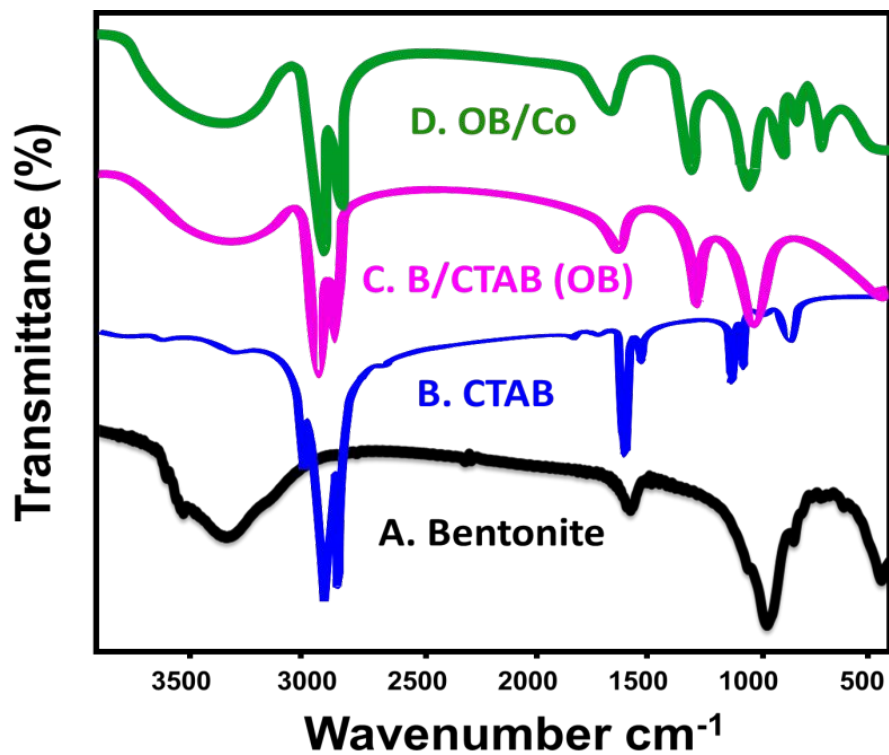

**Figure S2.** FTIR spectra of bentonite (A), cetyltrimethylammonium bromide (CTAB) (B), organically modified bentonite OB) (C) and organo-bentonite supported by  $\text{Co}_3\text{O}_4$  (OB/Co) (D)

### 3. Elovich model

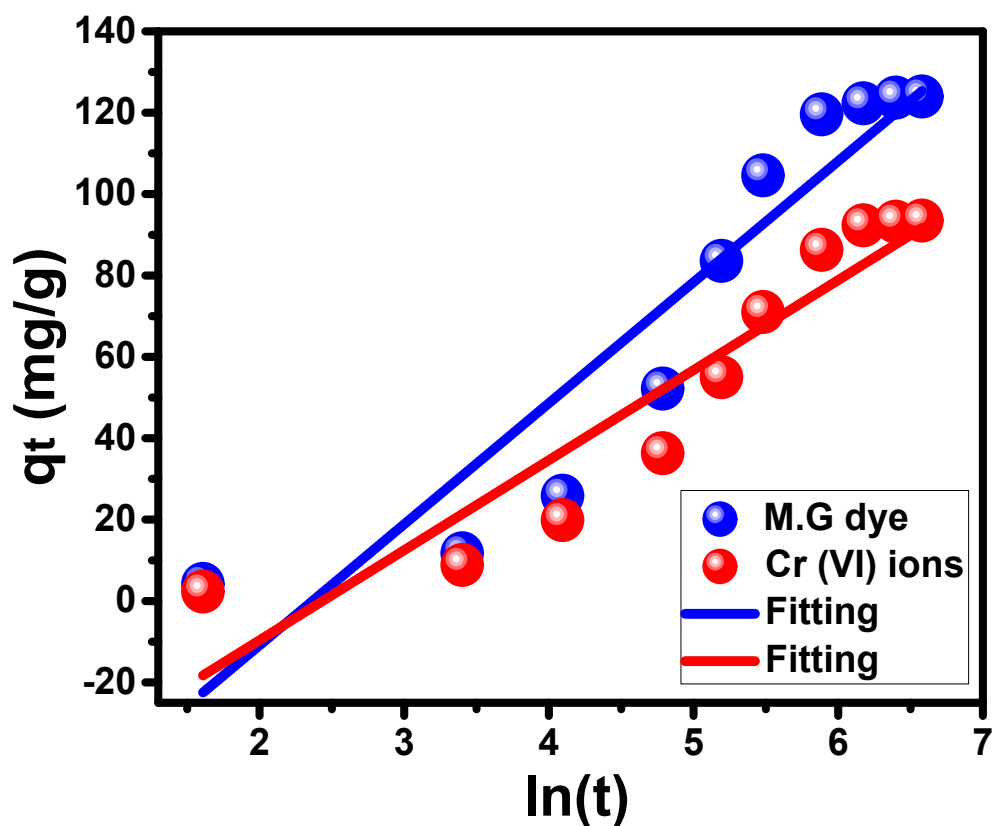

Figure S3. Fitting the adsorption results of M.G and Cr (VI) with Elovich kinetic model

#### 4. Effect of the integrating process

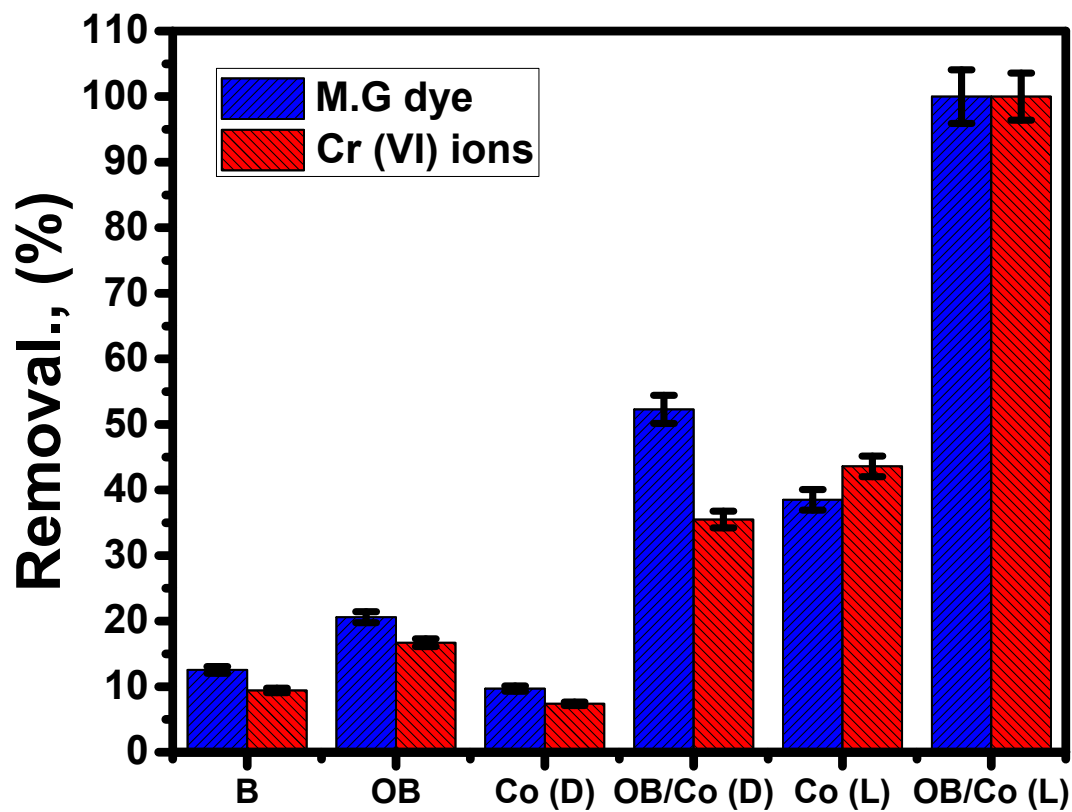

**Figure S4.** The effect of the integration process in enhancing the adsorption and photocatalytic performance of the composite in the removal of M.G and Cr (VI)
